# Supplementary material for: Brain Infection by Group B Streptococcus Induces Inflammation and Affects Neurogenesis in the Adult Mouse Hippocampus
Source: MDPI journal article supplement (doi:10.3390/cells12121570), 2023-06-06
Supplement: s1 [file s1]

# Supplementary

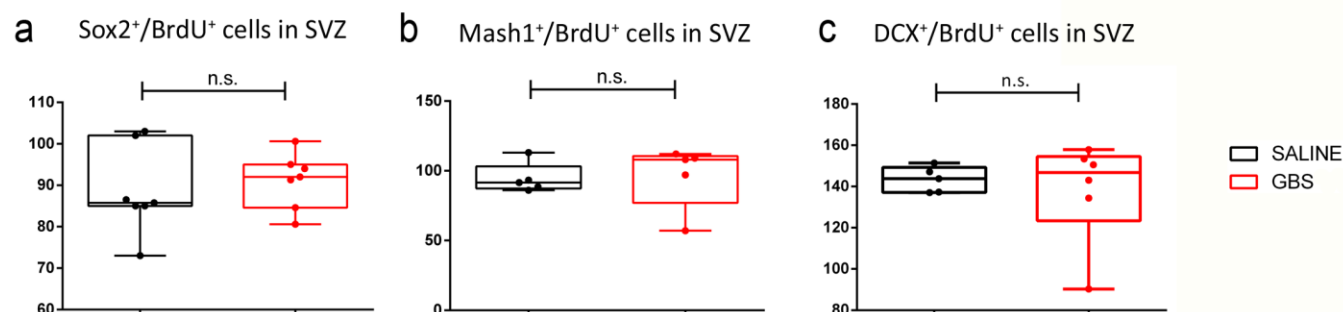

**Figure S1. Effect of GBS brain infection on BrdU-labeled cells in the subventricular zone.** Quantification of proliferating neural stem/progenitor cells (Sox2<sup>+</sup>/BrdU<sup>+</sup>, **a**), transit amplifying cells (Mash1<sup>+</sup>/BrdU<sup>+</sup>, **b**), and neuroblasts (DCX<sup>+</sup>/BrdU<sup>+</sup>, **c**) in the subventricular zone of GBS or saline-injected mice. Box plots with whiskers illustrate all data points, mean, min and max values. GBS, Group B Streptococcus; Sox2, SRY (sex determining region Y)-box 2; Mash1, mammalian achaete-scute homolog 1; DCX, doublecortin; BrdU; SVZ, subventricular zone.
